# Supplementary material
Source: Royal Society of Chemistry journal article supplement (doi:10.1039/d6gc02499h)
Supplement: d6gc02499h1.pdf [file d6gc02499h1.pdf]

## Supporting Information:

# Fully Bio-Based Cellulose Vitrimers with Dynamic Enamine Bonds: Toward Recyclable and Micropatternable Green Materials

Lingxian Kong<sup>a, b</sup>, Zitong Wang<sup>a, b</sup>, Mingshuai Guo<sup>a, b</sup>, Xiaofeng Sui<sup>a, b</sup>, Zhiping Mao<sup>a, b, c</sup>,  
Bijia Wang<sup>a, b</sup>, Liduo Rong<sup>a, b, \*</sup>, Xueling Feng<sup>a, b, c, \*</sup>

<sup>a</sup> Key Lab of Sustainable Low-carbon Technologies for Textile Dyeing and Finishing, Ministry of Education, College of Chemistry and Chemical Engineering, Donghua University, Shanghai 201620, China

<sup>b</sup> Shanghai Belt and Road Joint Laboratory of Textile Intelligent Manufacturing, Donghua University, Shanghai 201620, China

<sup>c</sup> National Innovation Center of Advanced Dyeing & Finishing Technology, Shandong Zhongkang Guochuang Research Institute of Advanced Dyeing & Finishing Technology Co., Ltd., Tai'an, Shandong 271000, China

*\*Co-corresponding authors:*

*E-mail addresses: [ldrong@dhu.edu.cn](mailto:ldrong@dhu.edu.cn) (L. Rong), [xfeng@dhu.edu.cn](mailto:xfeng@dhu.edu.cn) (X. Feng)*

Address: No. 2999 North Renmin Road, Shanghai 201620, People's Republic of China.

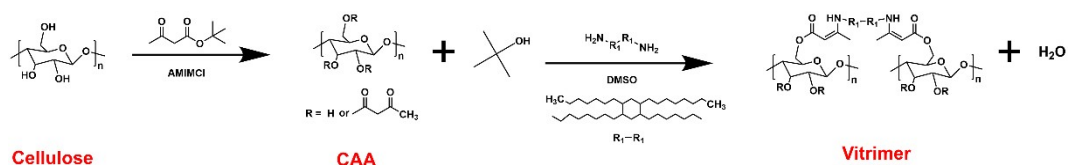

**Figure S1.** A detailed reaction scheme with explicit annotation of by-products (tert-butanol and water).

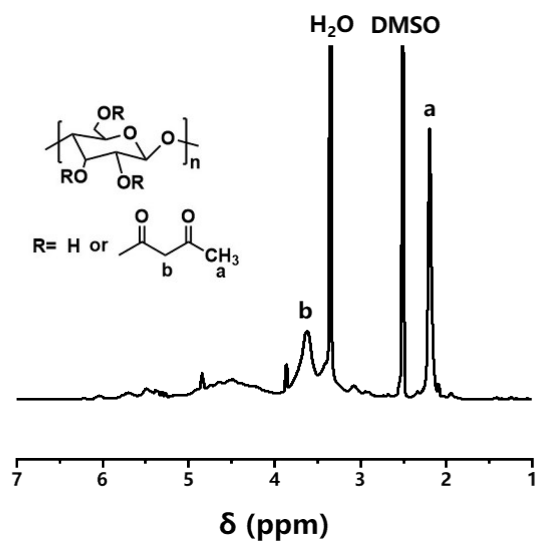

**Figure S2.**  $^1\text{H-NMR}$  spectrum of CAA in DMSO- $d_6$ .

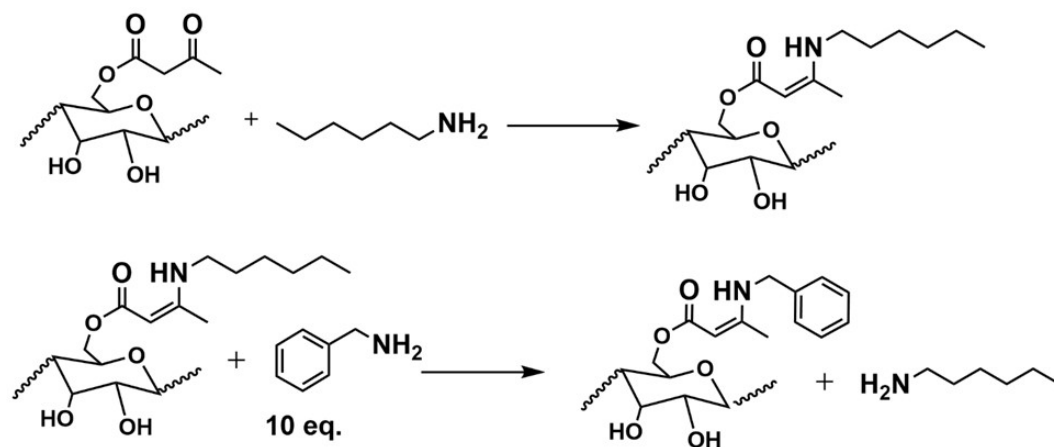

**Figure S3.** Chemical structural formula of the model reaction.

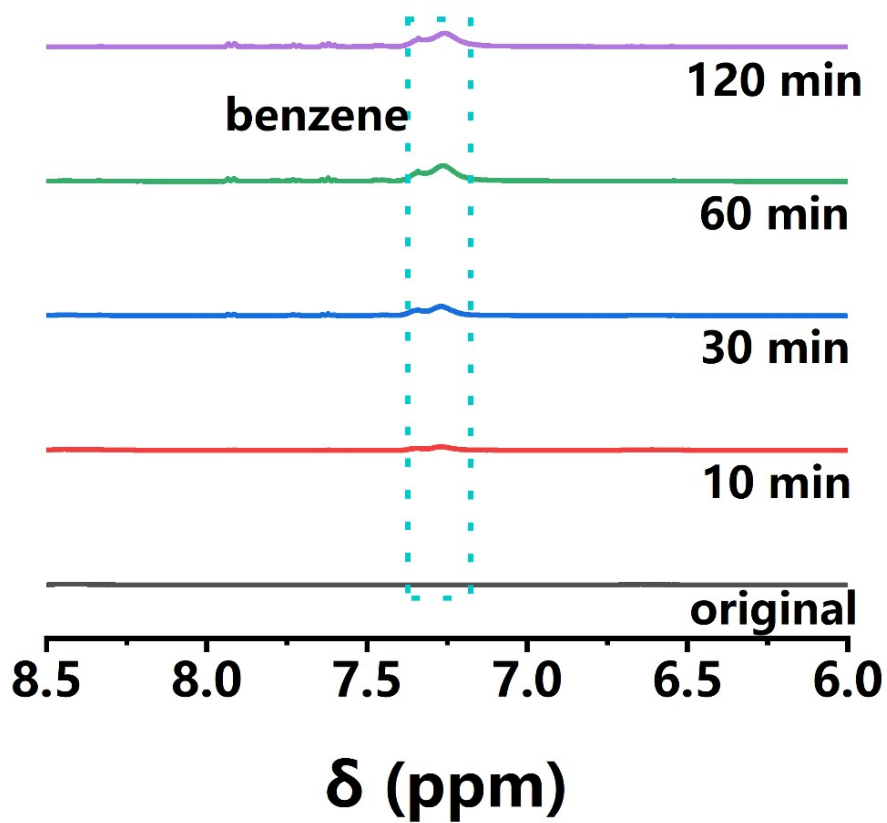

Figure S4. <sup>1</sup>H-NMR spectra tracing the model reaction.

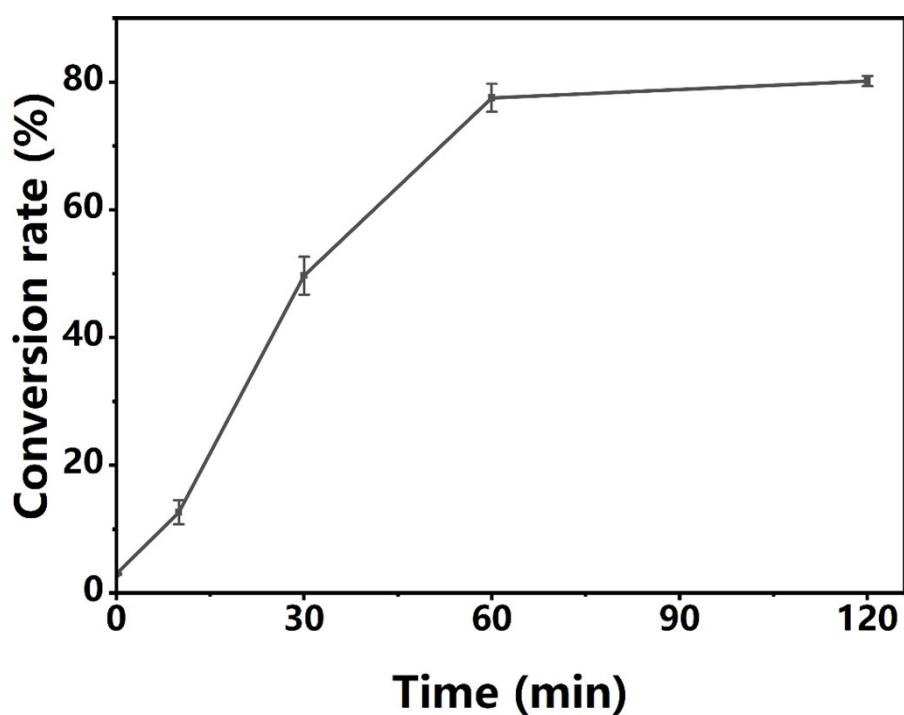

Figure S5. Reaction conversion rate of the model reaction.

**Table S1.** Degree of polymerization of different cellulose raw materials.

| Raw materials              | Degree of polymerization |
|----------------------------|--------------------------|
| Microcrystalline cellulose | 221                      |
| Wood pulp                  | 856                      |
| cotton                     | 1925                     |

<sup>a</sup> The author conducted experiments in the laboratory using the copper-ammonia method to determine the cellulose polymerization degree.

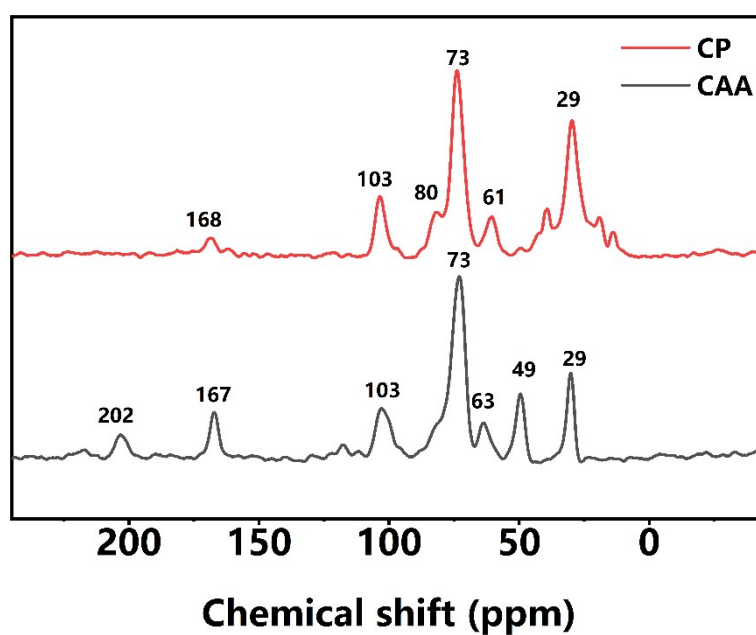

**Figure S6.** Solid-state <sup>13</sup>C NMR spectra of CAA and CP vitrimer.

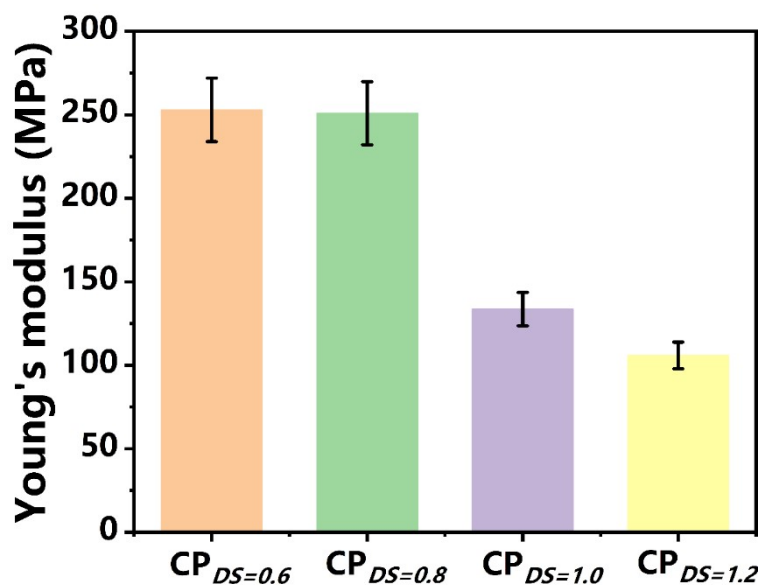

**Figure S7.** Young's modulus of bio-based vitrimers (CP<sub>DS=0.6</sub>, CP<sub>DS=0.8</sub>, CP<sub>DS=1.0</sub>, CP<sub>DS=1.2</sub>).

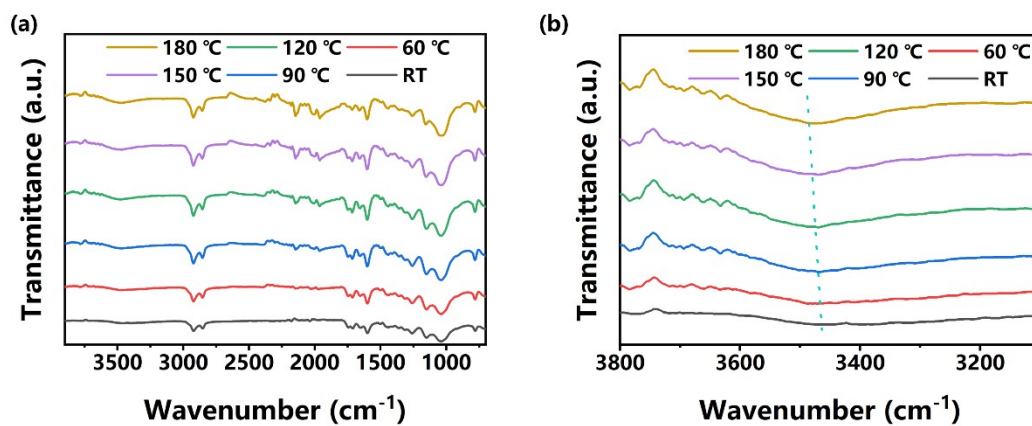

Figure S8. FTIR spectra of CP in different temperature (a) Full Scope (b) Partial Scope.

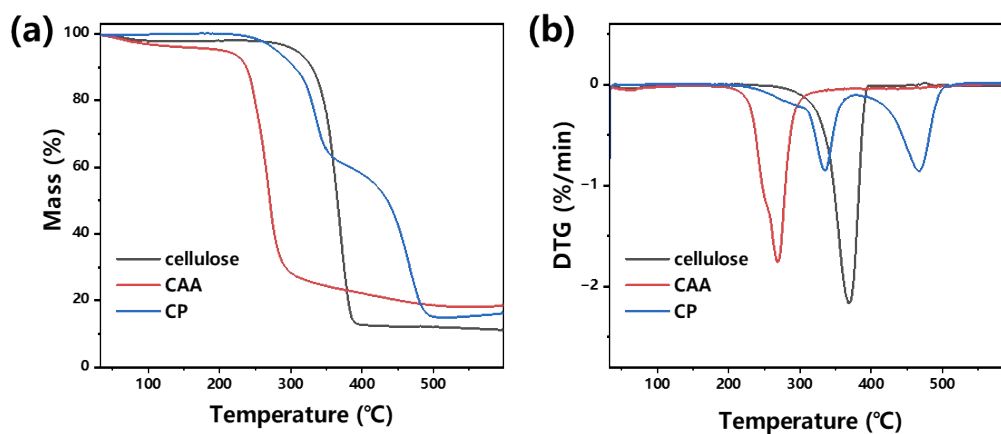

Figure S9. TG (a) and DTG (b) curves for CP, CAA, cellulose.

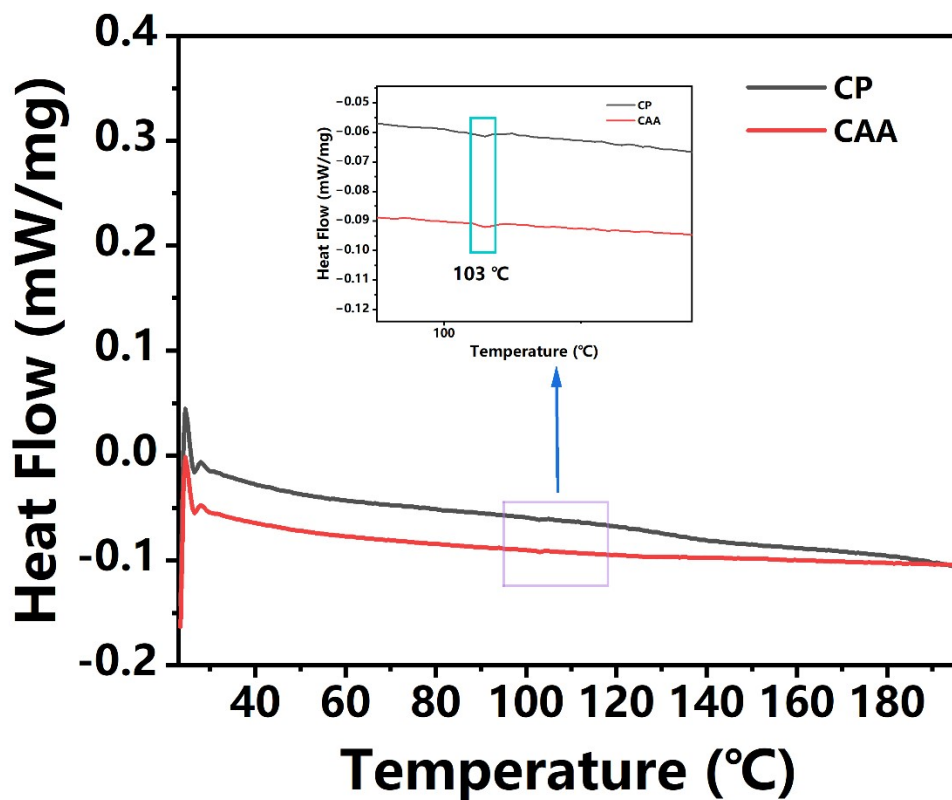

Figure S10. DSC curves for CP, CAA.

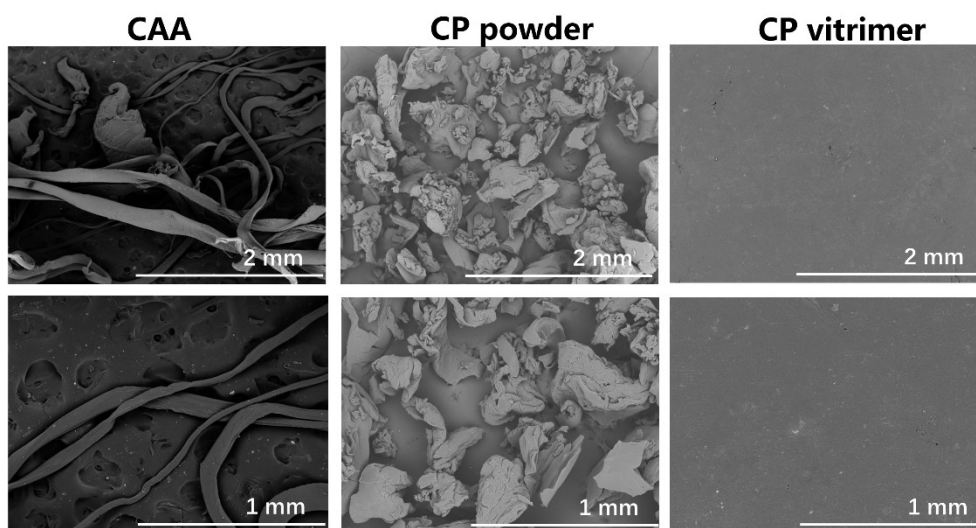

Figure S11. The SEM images of CAA, CP powder and CP vitrimer surfaces.

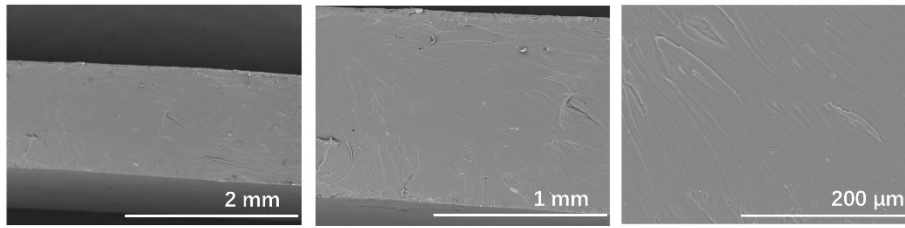

**Figure S12.** The SEM images of the CP cross-section.

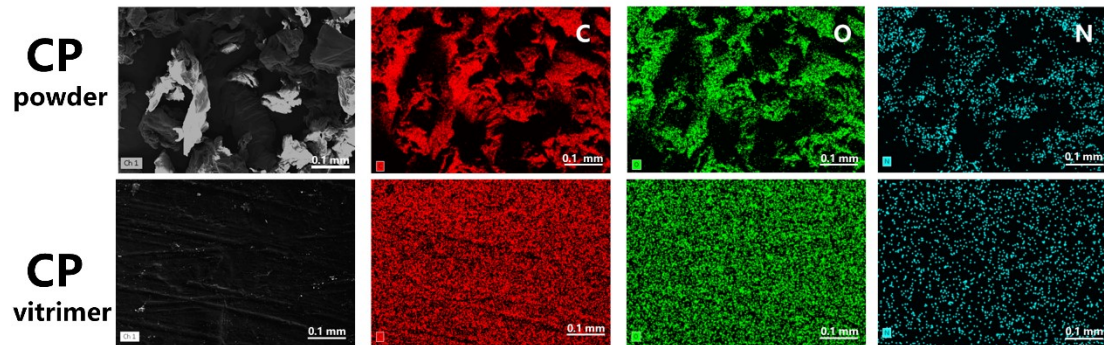

**Figure S13.** The EDS mapping images of the CP powder and CP vitrimer.

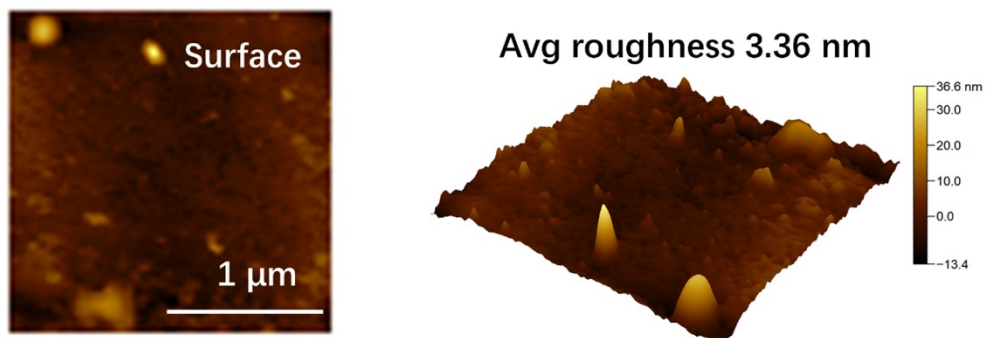

**Figure S14.** The AFM images of the CP surface.

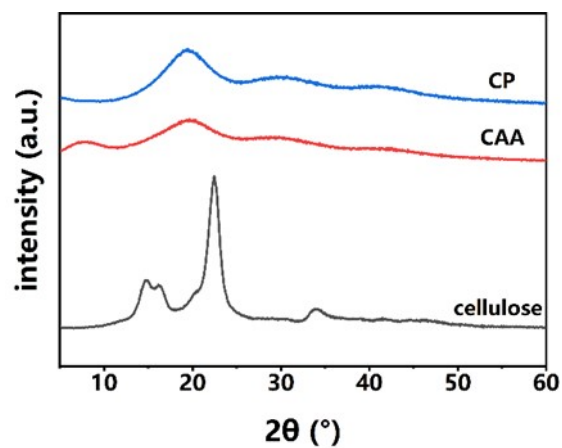

**Figure S15.** XRD images of cellulose, CAA and CP.

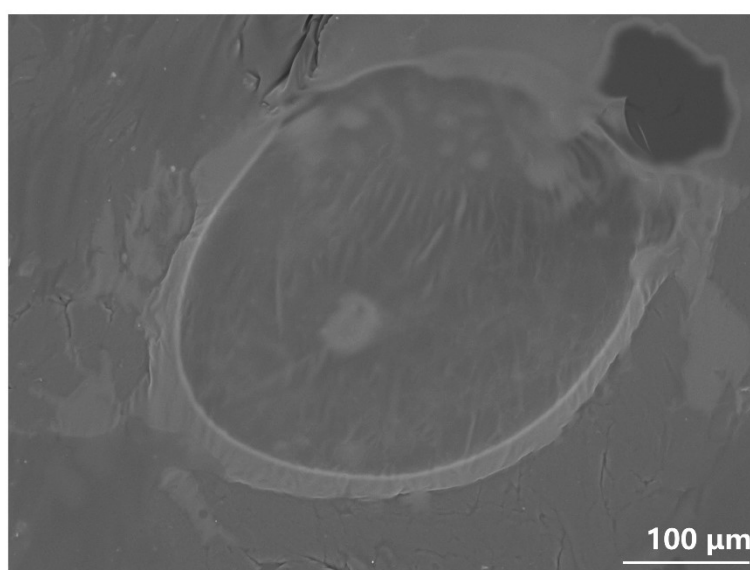

**Figure S16.** The SEM image of the etching area in the CP.

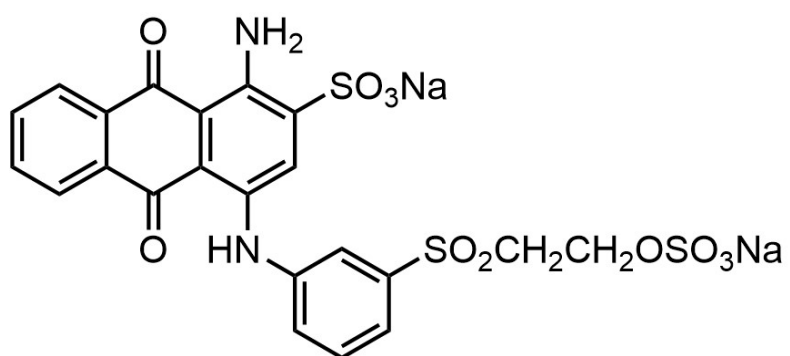

**Figure S17.** The structural formula of the dye.

## Green chemistry metrics

The system's green chemistry profile was assessed using the following parameters:

### (a) Atom economy (AE)

AE quantifies the efficiency of a chemical reaction and is defined as the percentage of atoms from the reactants that are incorporated into the desired product<sup>1, 2</sup>. The ideal AE value of 100% signifies complete atom retention from the starting materials. For the CAA and CP samples, AE values were determined via Equation S1:

$$AE (\%) = \frac{\text{Molecular weight of the product}}{\sum \text{Molecular weight of reactants}} \times 100 \quad (\text{S1})$$

### (b) Environmental factor (E-factor) and process mass intensity (PMI) analysis

According to established definition<sup>3, 4</sup>, the E-factor evaluates the sustainability of a chemical process by quantifying the mass of waste generated per unit of product. Assuming complete ethanol recovery, the E-factor values for the CP samples were obtained from Equation S2:

:

$$E - factor = \frac{\sum m(\text{raw materials}) + \sum m(\text{spent reagents}) + \sum m(\text{solvent losses}) - m(\text{product})}{m(\text{product})} \quad (\text{S2})$$

As a key efficiency metric, PMI accounts for the total mass of all materials used divided by the mass of the obtained product. The corresponding PMI values for CP were evaluated via Equation S3:

$$PMI = \frac{\sum m(\text{raw materials}) + \sum m(\text{reagents}) + \sum m(\text{solvent})}{m(\text{product})} \quad (\text{S3})$$

### (c) Biorenewable carbon (BRC) content

BRC content represents the fraction of total carbon originating from renewable biomass sources<sup>5</sup>. For the CP samples, BRC values were evaluated via equation S4:

$$BRC (\%) = \frac{\textit{Biosourced carbon}}{\textit{Biosourced carbon} + \textit{Fossil carbon}} \times 100 \quad (\text{S4})$$

(d) Energy consumption

The energy consumption across individual processing steps was evaluated using the rated power of the laboratory equipment and its respective runtime<sup>6</sup>, following Equation S5:

$$E = \sum(P_i \times t_i) \quad (\text{S5})$$

where E represents the total energy consumption,  $P_i$  is the rated power of each laboratory device, and  $t_i$  is its corresponding operational time. The reported values are laboratory-scale estimates derived from a representative batch that started with 8 g of cellulose as the raw material.

**Table S2.** Detailed material quantities and derived carbon for each synthetic step.

| Step | Material          | Type         | Output       | MW (g/mol) | Equiv.                        | Mol  | Weight (g) | Derived carbon (after calculation) |  |
|------|-------------------|--------------|--------------|------------|-------------------------------|------|------------|------------------------------------|--|
| 1    | Cotton            | Raw material |              | 162.1      | 1.0                           | 0.05 | 8.1        | 6                                  |  |
|      | AMIMCl            | Solvent      |              | 158.6      |                               |      | 151.9      |                                    |  |
|      | DMF               | Reagent      |              | 73.1       |                               |      | 80.0       |                                    |  |
|      | t-BAA             | Raw material |              | 158.2      |                               | 0.46 | 73.2       | 3.2                                |  |
|      |                   |              |              | CAA        | 230.1                         |      |            | 9.2                                |  |
|      |                   | CAA          | Intermediate |            | 230.1                         | 1.0  | 0.05       | 9.2                                |  |
| 2    | DMSO <sup>a</sup> | Solvent      |              | 78.1       |                               |      | 80         |                                    |  |
|      | Priamine<br>1075  | Raw material |              | 530        | Acetoacetate/<br>amine=1: 1.1 | 0.03 | 14.6       | 15.8                               |  |
|      |                   |              | CP           | 448.6      |                               |      | 17.9       | 25                                 |  |
|      |                   |              |              |            |                               |      |            |                                    |  |

The material inputs were estimated based on a representative CP preparation batch.

For the above data, the contribution values were calculated as  $DS \times M$ , where  $DS = 0.8$ .

<sup>a</sup> DMSO could be removed by rotary evaporation.

**Table S3.** Material efficiency metrics.

| Step | Sample | AE (%) <sup>a</sup> | E-factor          | PMI (g/g) | BRC% |
|------|--------|---------------------|-------------------|-----------|------|
| 1    | CAA    | 71.8                | 33.0 <sup>b</sup> | 34.0      | 65.2 |
| 2    | CP     | 95.9                | 0.3               | 5.8       | 87.2 |

For the above data, the contribution values were calculated as  $DS \times M$ , where  $DS = 0.8$ .

a The molecular weight of the reactant used in Step 1 was 320.3 g/mol, and that used in Step 2 was 463.3 g/mol.

b The E-factor could be reduced even further through the use of spray drying.

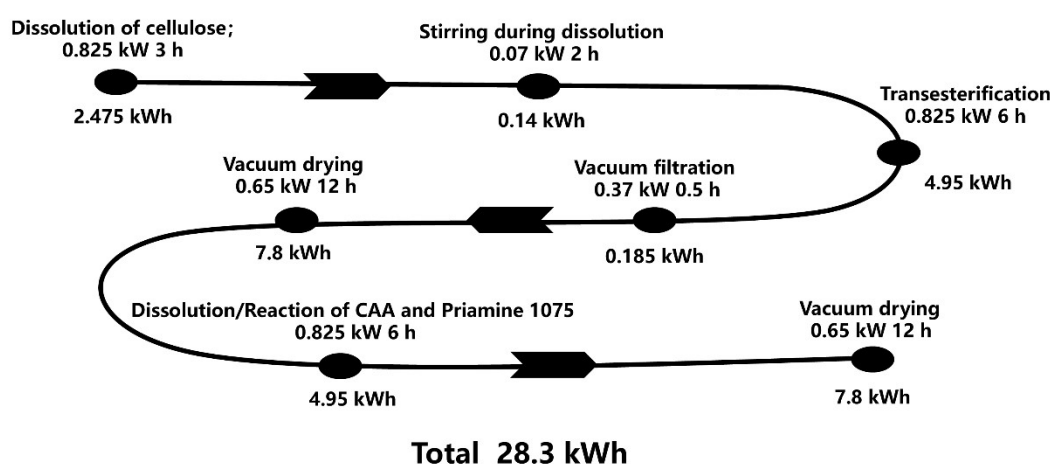

**Figure S18.** Flowchart of the experimental energy consumption calculation (Laboratory-scale).

**Table S4** The green advance of this work compared with the previous literatures

| Raw material                                            | Crosslinking conditions |          | Hot pressing conditions |          |                 |                                                       | Degradation time (efficiency) | Reference |
|---------------------------------------------------------|-------------------------|----------|-------------------------|----------|-----------------|-------------------------------------------------------|-------------------------------|-----------|
|                                                         | Temperature (°C)        | Time (h) | Temperature (°C)        | Time (h) | Pressure        | Catalyst                                              |                               |           |
| Cellulose acetoacetate/Priamine 1075 (Plant oil)        | 25-100                  | 2-6      | 120                     | 0.25     | 30 MPa (6.2 kN) | No                                                    | 56 d (90%)                    | This work |
| Epoxy dicardanol-based succinate                        | 80-150                  | 2        | 160-180                 | 1        | 20 MPa          | 1, 5, 7-triazadicyclic [4.4.0] deca-5-ene             | No data                       | 7         |
| Cardanol-based vinylogous urethane vitrimer             | 130                     | About 3  | 130                     | 1        | 10 MPa          | No                                                    | No data                       | 8         |
| Cardanol-based epoxy novolac resin/Itaconic acid        | 120-150                 | 2        | 180                     | 1        | 130 kN          | 2-ethyl-4-methylimidazole and zinc triflate Zinc salt | No data                       | 9         |
| Chitosan/Vanillin                                       | 80                      | 9        | 130                     | 0.5      | 20 MPa          | No                                                    | 100 d (70%)                   | 10        |
| Softwood kraft lignin/poly(ethyleneglycol)divinyl ether | 110                     | 6        | 150                     | 12       | 0               | No                                                    | No data                       | 11        |

Starch-reinforced vinylogous  
urethane vitrimer composites

135

0.75

160

0.18

10 MPa

No

No data

<sup>12</sup>

---

## Reference:

- (1) Sheldon, R. A. The e factor: Fifteen years on. *Green Chemistry* **2007**, *9* (12), 1261-1384. DOI: 10.1039/b713736m.
- (2) Chen, Y.; Xie, C.; Wu, T.; He, T.; Xie, H.; Guo, Y. Water-mediated fabrication of reprocessable and self-healing cellulose-based polyimine plastics. *Green Chemistry* **2026**. DOI: 10.1039/d6gc01654e.
- (3) Sheldon, R. A. E factors, green chemistry and catalysis: An odyssey. *Chemical Communications* **2008**, (29). DOI: 10.1039/b803584a.
- (4) Sheldon, R. A. The e factor 25 years on: The rise of green chemistry and sustainability. *Green Chemistry* **2017**, *19* (1), 18-43. DOI: 10.1039/c6gc02157c.
- (5) Skliutas, E.; Lebedevaite, M.; Kasetaitė, S.; Reksitytė, S.; Lileikis, S.; Ostrauskaite, J.; Malinauskas, M. A bio-based resin for a multi-scale optical 3d printing. *Scientific Reports* **2020**, *10* (1). DOI: 10.1038/s41598-020-66618-1.
- (6) Cespi, D. Procedural life cycle inventory of chemical products at laboratory and pilot scale: A compendium. *Green Chemistry* **2024**, *26* (18), 9554-9568. DOI: 10.1039/d4gc01372g.
- (7) Hu, Y.; Tong, S.; Hu, L.; Zhang, M.; Huang, Q.; Sha, Y.; Jia, P.; Zhou, Y. Molecularly engineered cardanol derived epoxy vitrimers based on dynamic disulfide and dynamic ester exchanges with desirable dynamic response, degradability, and recyclability. *Chemical Engineering Journal* **2023**, *477*, 147284. DOI: 10.1016/j.cej.2023.147284.
- (8) Chen, F.; Gao, F.; Zhong, J.; Shen, L.; Lin, Y. Fusion of biobased vinylogous urethane vitrimers with distinct mechanical properties. *Materials Chemistry Frontiers* **2020**, *4* (9), 2723-2730. DOI: 10.1039/d0qm00302f.
- (9) Albertini, E.; Dalle Vacche, S.; Bongiovanni, R.; Bianco, I.; Blengini, G. A.; Vitale, A. Biobased and reprocessable vitrimers based on cardanol-derived epoxy for more sustainable thermosets. *ACS Sustainable Chemistry & Engineering* **2025**, *13* (5), 2120-2131. DOI: 10.1021/acssuschemeng.4c09035.
- (10) Zhang, X.; Lin, L.; Zhou, H.; Zhou, G.; Wang, X. All-natural chitosan-based polyimine vitrimer with multiple advantages: A novel strategy to solve nondegradable plastic waste pollution. *Journal of Hazardous Materials* **2024**, *465*, 133030. DOI: 10.1016/j.jhazmat.2023.133030.
- (11) Moreno, A.; Morsali, M.; Sipponen, M. H. Catalyst-free synthesis of lignin vitrimers with tunable mechanical properties: Circular polymers and recoverable adhesives. *ACS Applied Materials & Interfaces* **2021**, *13* (48), 57952-57961. DOI: 10.1021/acsaami.1c17412.
- (12) Haida, P.; Chirachanchai, S.; Abetz, V. Starch-reinforced vinylogous urethane vitrimer composites: An approach to biobased, reprocessable, and biodegradable materials. *ACS Sustainable Chemistry & Engineering* **2023**, *11* (22), 8350-8361. DOI: 10.1021/acssuschemeng.3c01340.
